# Supplementary material for: Structural basis of intron selection by U2 snRNP in the presence of covalent inhibitors
Source: Springer Nature journal article supplement (doi:10.1038/s41467-021-24741-1), 2021-07-23
Supplement: MOESM1 [file 41467_2021_24741_MOESM1_ESM.pdf]

# Structural basis of intron selection by U2 snRNP in the presence of covalent inhibitors

Constantin Cretu<sup>1†</sup>, Patricia Gee<sup>2</sup>, Xiang Liu<sup>2</sup>, Anant Agrawal<sup>2</sup>, Tuong-Vi Nguyen<sup>2</sup>, Arun K. Ghosh<sup>3</sup>, Andrew Cook<sup>2</sup>, Melissa Jurica<sup>4</sup>, Nicholas A. Larsen<sup>2</sup>, Vladimir Pena<sup>1\*</sup>

<sup>1</sup>Research Group Mechanisms and Regulation of Splicing, The Institute of Cancer Research, Fulham Road 237, SW3 6JB London, United Kingdom

<sup>2</sup>H3 Biomedicine, Inc., Cambridge, MA 03129, USA

<sup>3</sup>Departments of Chemistry and Medicinal Chemistry, Purdue University, West Lafayette, Indiana, 47907, USA

<sup>4</sup>Department of Molecular, Cell and Developmental Biology, University of California, Santa Cruz CA95064, USA

<sup>†</sup>Present address: Cluster of Excellence Multiscale Bioimaging (*MBExC*), Universitätsmedizin Göttingen, Robert-Koch-Str. 40, 37075 Göttingen, Germany

Lead Contact: Vladimir Pena

\* Correspondence to [vlad.pena@icr.ac.uk](mailto:vlad.pena@icr.ac.uk)

# Supplementary Figures

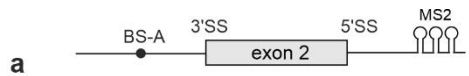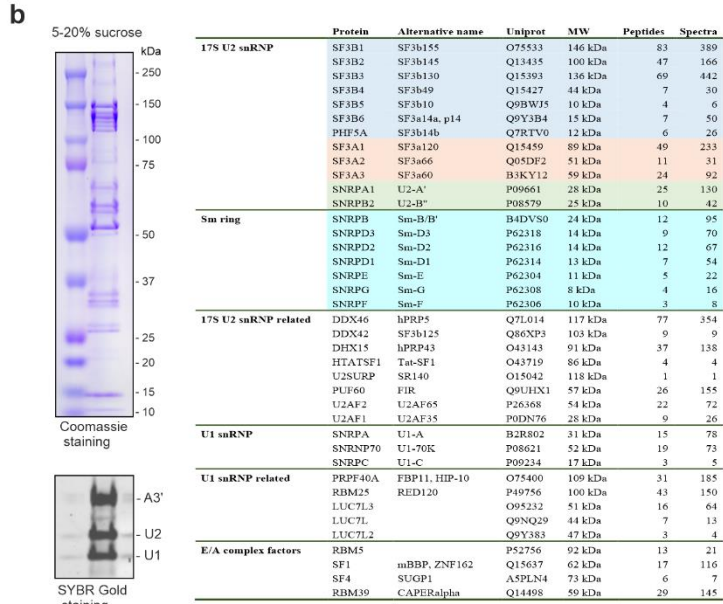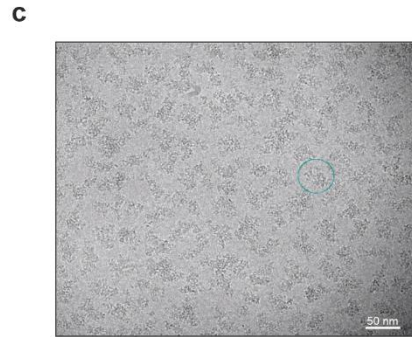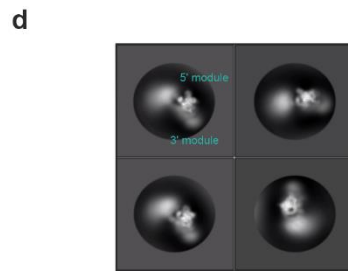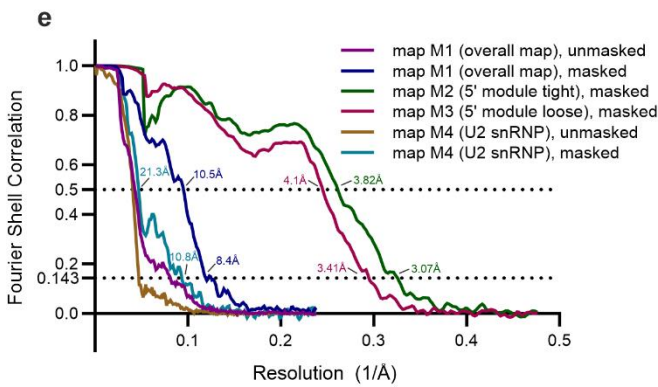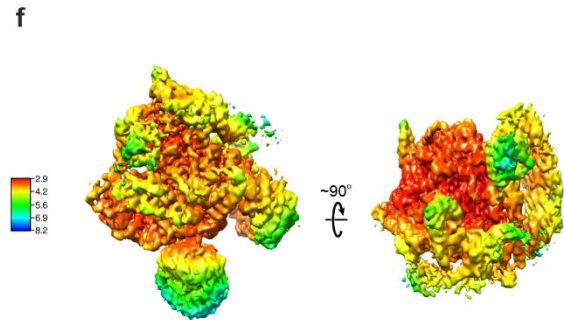

**g** Sphericity = 0.826 out of 1. Global resolution = 3.09 Å.

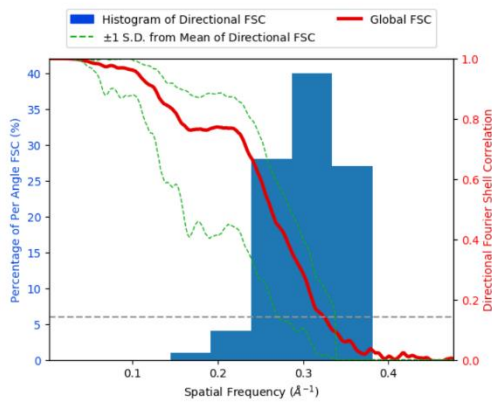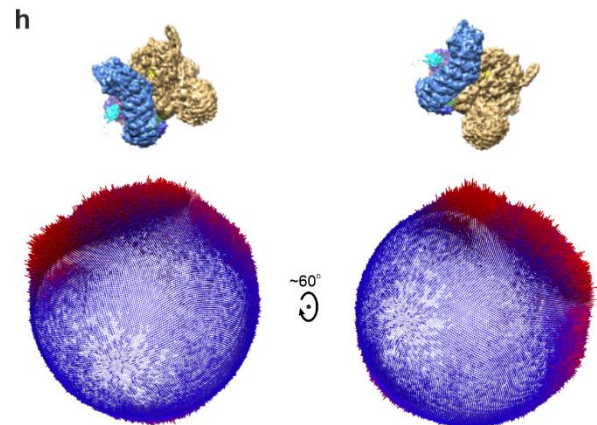

**Supplementary Figure 1. Purification, characterization, and cryo-EM structure determination of the A3'-SSA complex.** **a** Schematic of the RNA construct used for the assembly of the human A3' complex. **b** SDS-PAGE analysis of the purified A3'-SSA complex. The protein composition of the A3'-SSA spliceosomes as revealed by LC/MS-MS is shown in the table. The proteins present in the cryo-EM model are highlighted. See also Supplementary Data 1 for a complete overview of the detected peptides. The A3'-SSA complex preparation for cryo-EM analysis was repeated at least three times with similar results. Source data are provided as a Source Data File. **c** Representative cryo-EM micrograph of the human A3'-SSA complex (cropped). The micrograph was visualized with XMIPP3 with the default settings. Two independent cryo-EM datasets of the A3'-SSA were acquired, resulting in comparable 2D classes and 3D reconstructions. However, only the A3'-SSA dataset recorded on the K3 detector is reported in the current manuscript. **d** Typical reference-free 2D class averages of the A3'-SSA complex. **e** Global resolution estimation of the A3'-SSA cryo-EM maps by Fourier Shell Correlation (FSC). The FSC was calculated between two independently refined half maps in RELION. The gold-standard FSC=0.143 criterion indicates a global resolution of ~3.07 Å for the U2 5' module of the complex. **f** Local resolution of the U2 5' module of the A3'-SSA complex. The U2 5' domain map shows a resolution range between ~2.9 Å at the core and ~8.2 Å at its periphery. Local resolution was estimated in RELION and visualized in UCSF Chimera. **g** Directional resolution of the U2 5' module map. The 3D FSC analysis was carried out with the 3D FSC server (3dfsc.salk.edu). **h** Angular distribution plot of the particle images contributing to the focused map of the U2 5' module. The red color indicates a higher number of particles at a given projection angle. The final map of the U2 5' module (map M2, unsharpened) is displayed above the Euler angle distribution plot and is color-coded as in Figure 1.

**a**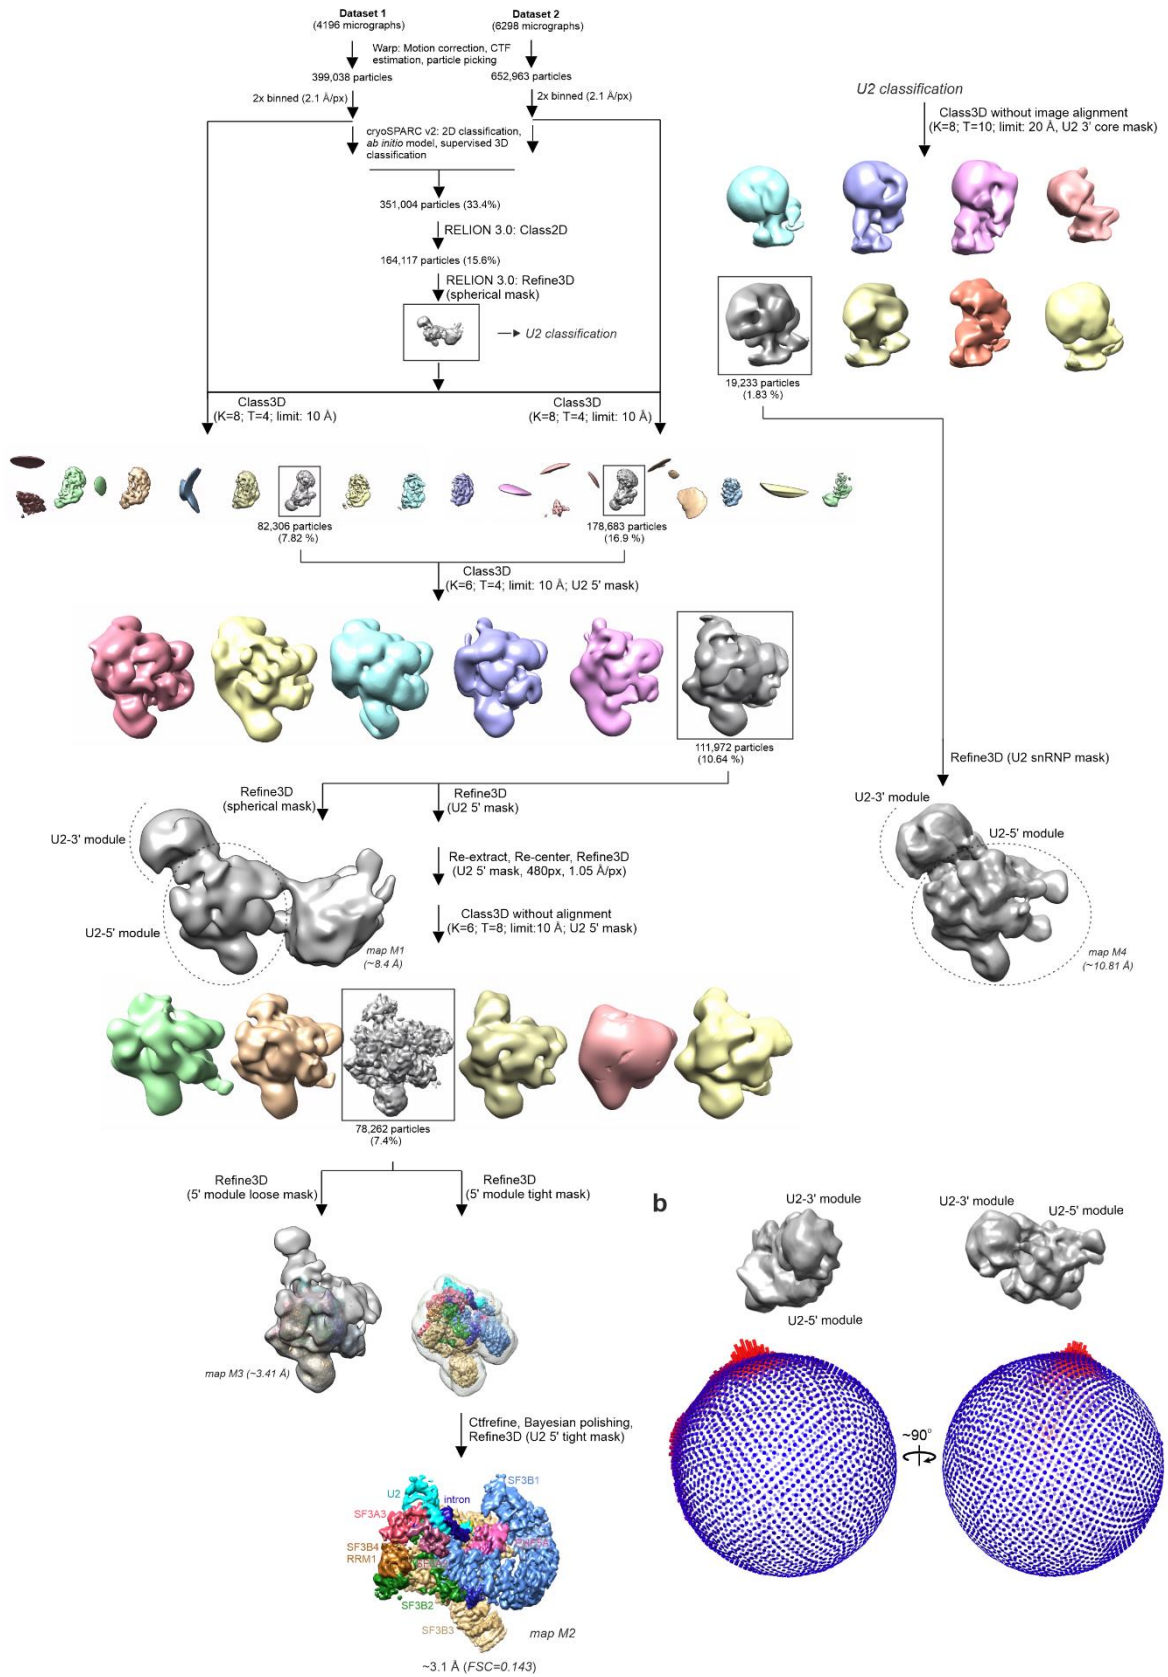**b**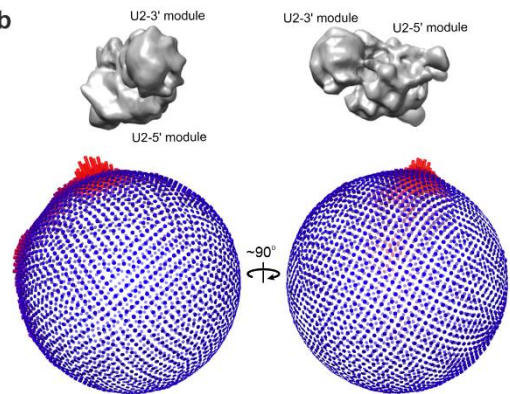

**Supplementary Figure 2. Cryo-EM image-processing workflow of the A3'-SSA complex.**  
**a** Cryo-EM data processing schematic showing the most significant steps of the computational analysis. The detailed image-processing procedure is described in the Methods section. **b** Angular distribution plot of the particle images, which contributed to the cryo-EM map of the U2 snRNP region of the complex.



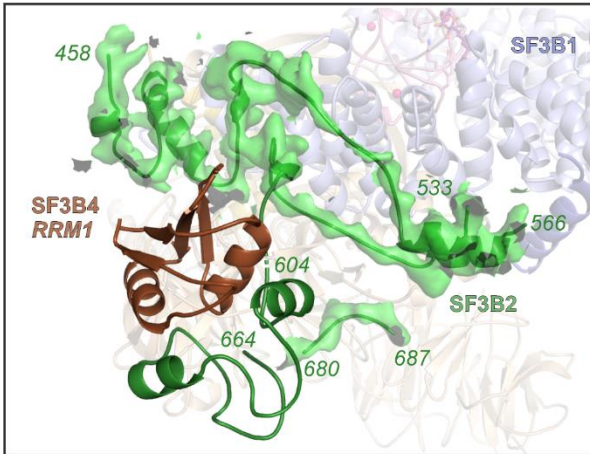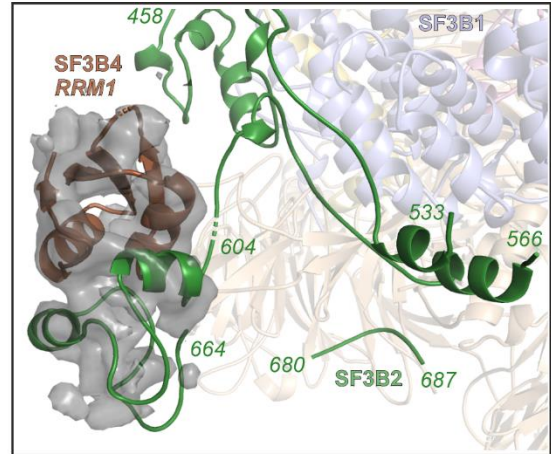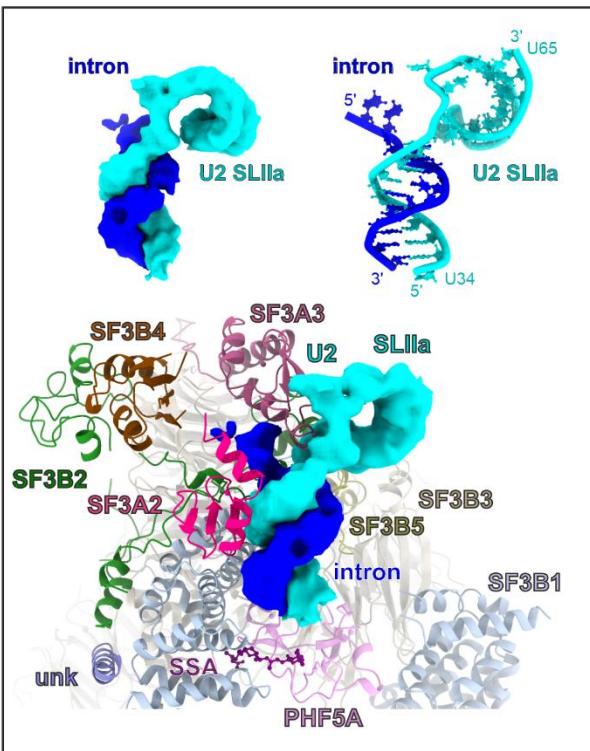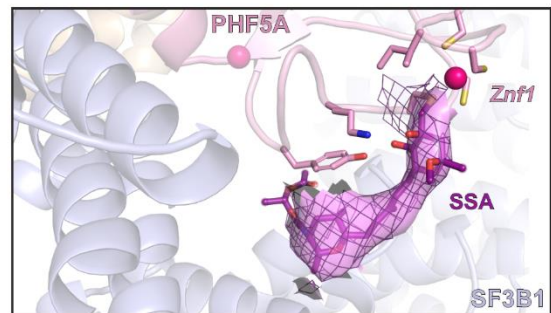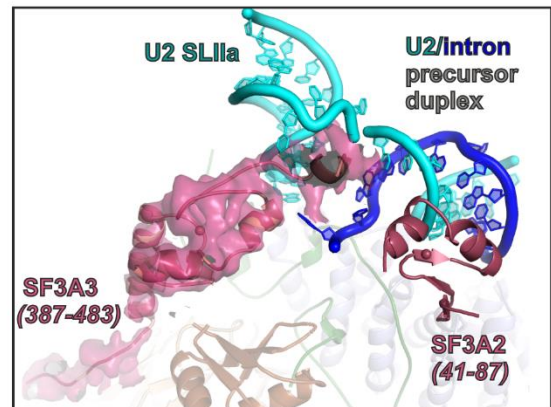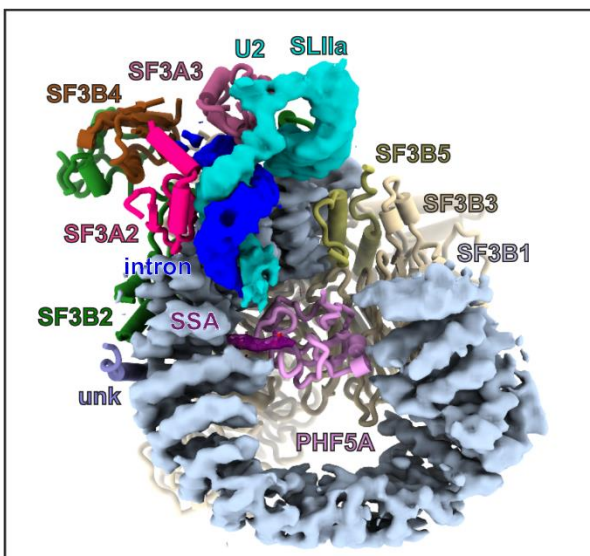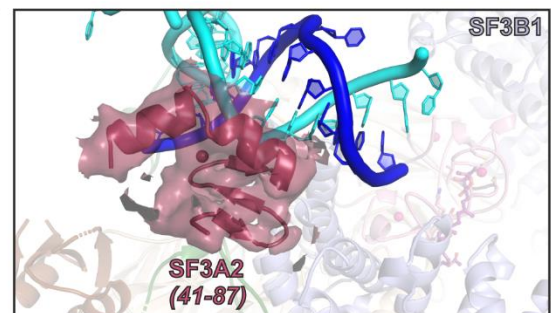

**Supplementary Figure 3. Cryo-EM density snapshots of selected regions of the U2 5' module.** The subunits of the complex are colored and labeled as in Figure 1.



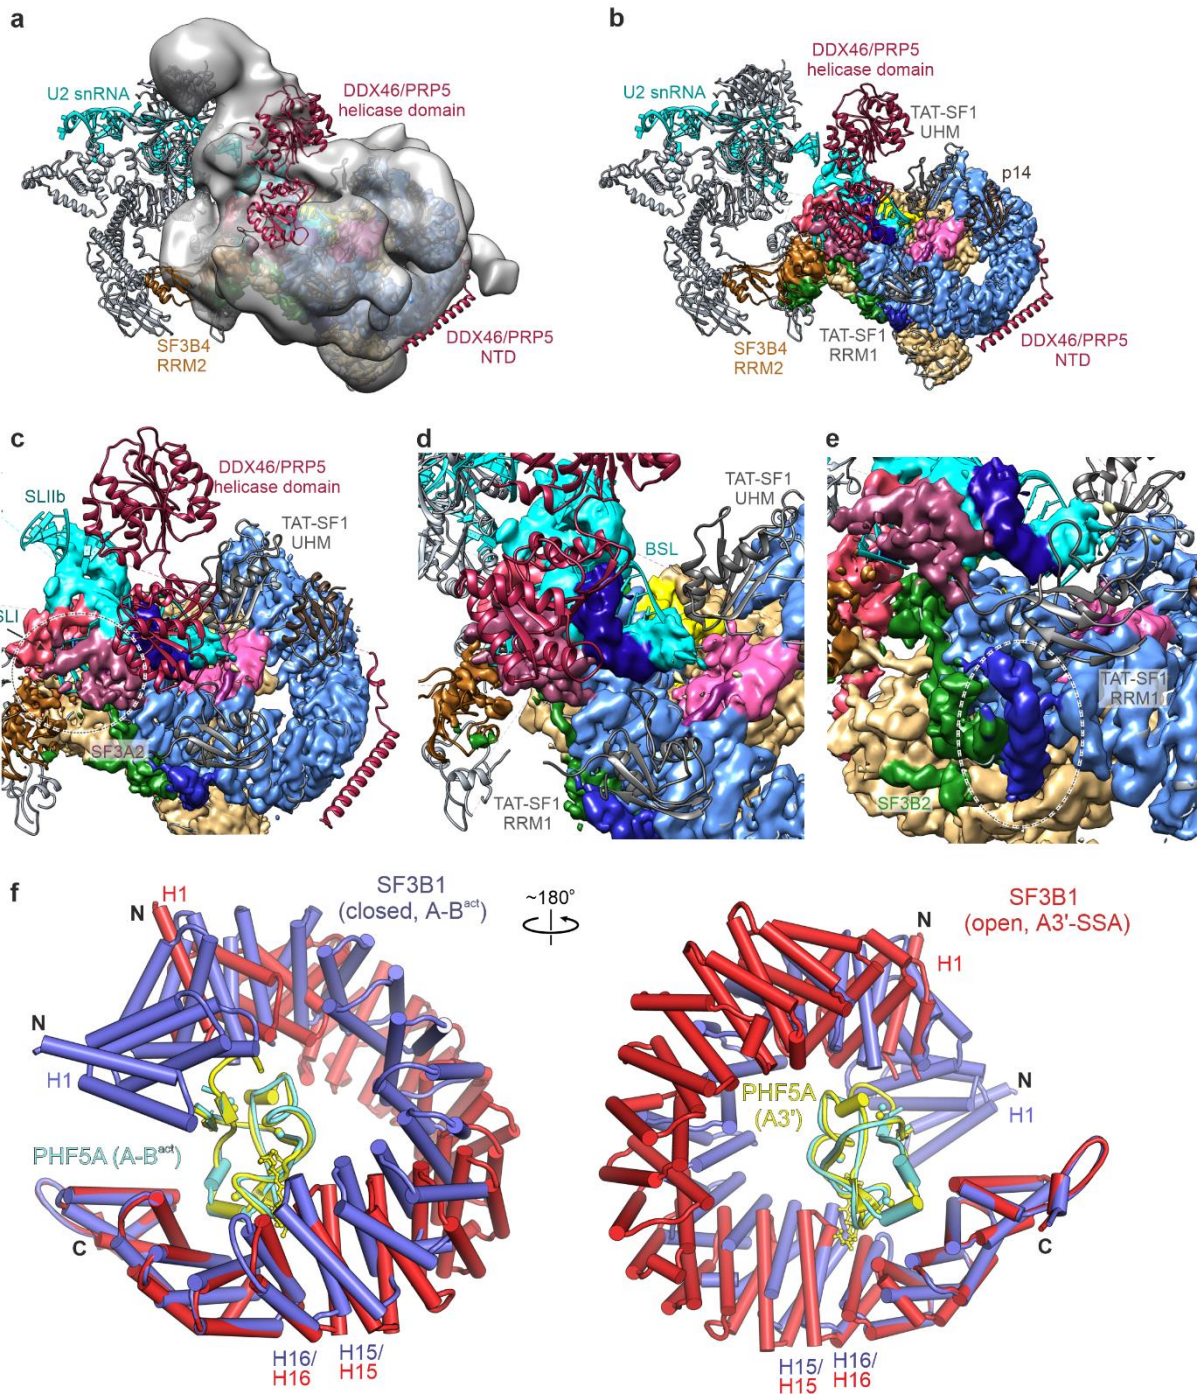



**Supplementary Figure 4. Comparison between the 17S U2 snRNP particle and the A3'-SSA complex.** **a-b** Superposition of the 17S U2 snRNP model (PDB 6Y50) onto the U2 5' module of A3'-SSA. A more loosely masked density map (map M3, low-passed to 15 Å) is depicted together with the higher resolution U2 5' map (map M2), colored according to its constituent subunits. Compared to the 17S U2 snRNP structure, DDX46/hPrp5 helicase region is no longer present as its location in the A3'-SSA complex, and the density for its NTD region is absent. **c-d** Remodelling of the 5' end of the U2 snRNA upon the formation of the U2/intron precursor duplex. The U2 SLI, as seen in the 17S U2 snRNP, clashes severely with the zinc finger domain SF3A2 in A3'-SSA, which apparently stabilizes the U2/intron precursor duplex. **e** An unassigned helical element is observed in the A3'-SSA structure at the hinge region of SF3B1. **f** Structural superposition between the SF3B modules from A3'-SSA and B<sup>act</sup> (PDB 5Z58) complexes, indicating the difference between the open and closed conformations of SF3B1 (red and blue, respectively). Only SF3B1 and PHF5A are shown for clarity's sake. Note that PHF5A and the HEAT repeats H16-H20 are very similar in the two structures.

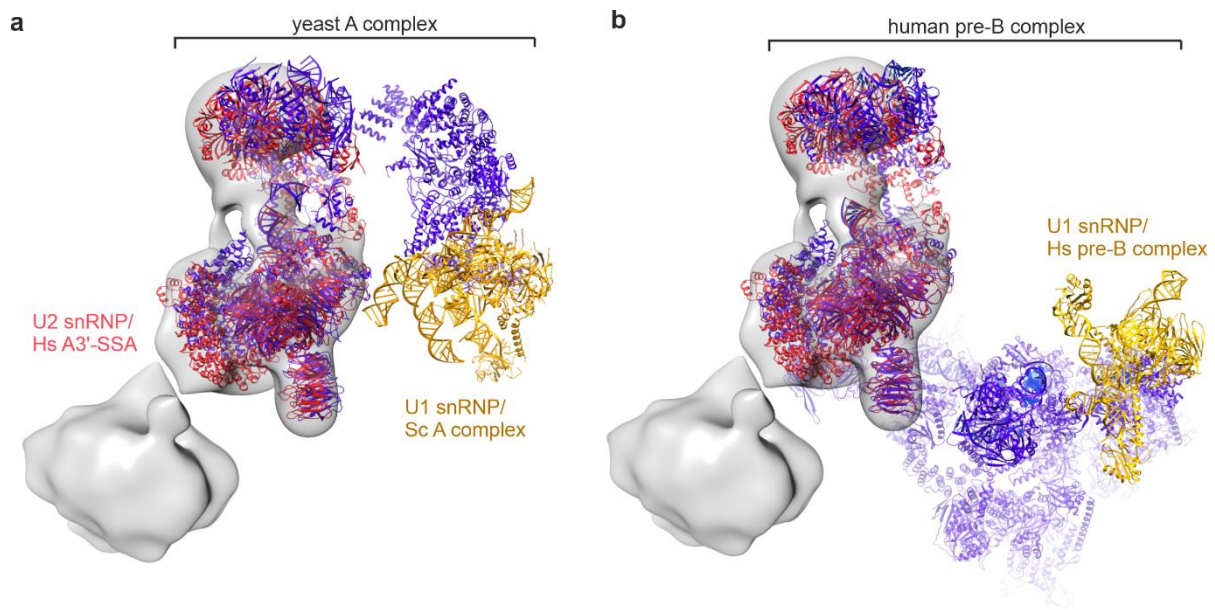

**Supplementary Figure 5. Comparison between A3'-SSA, yeast A, and the human pre-B complexes.** **a** Superposition between A3'-SSA (red) and the yeast A complex (PDB 6g90, r.m.s.d. 3.8 Å for 952 equivalent residues from SF3B). U1 snRNP is depicted in gold, whereas the other A complex subunits are coloured in blue. **b** Structural superposition between A3'-SSA (red) and the human pre-B complex (PDB 6qx9, r.m.s.d. 0.837 Å for 1239 equivalent residues from SF3B). U1 snRNP is depicted in gold, whereas the other pre-B complex subunits are coloured in blue. The overall cryo-EM map of A3'-SSA (map M1) is shown in gray.

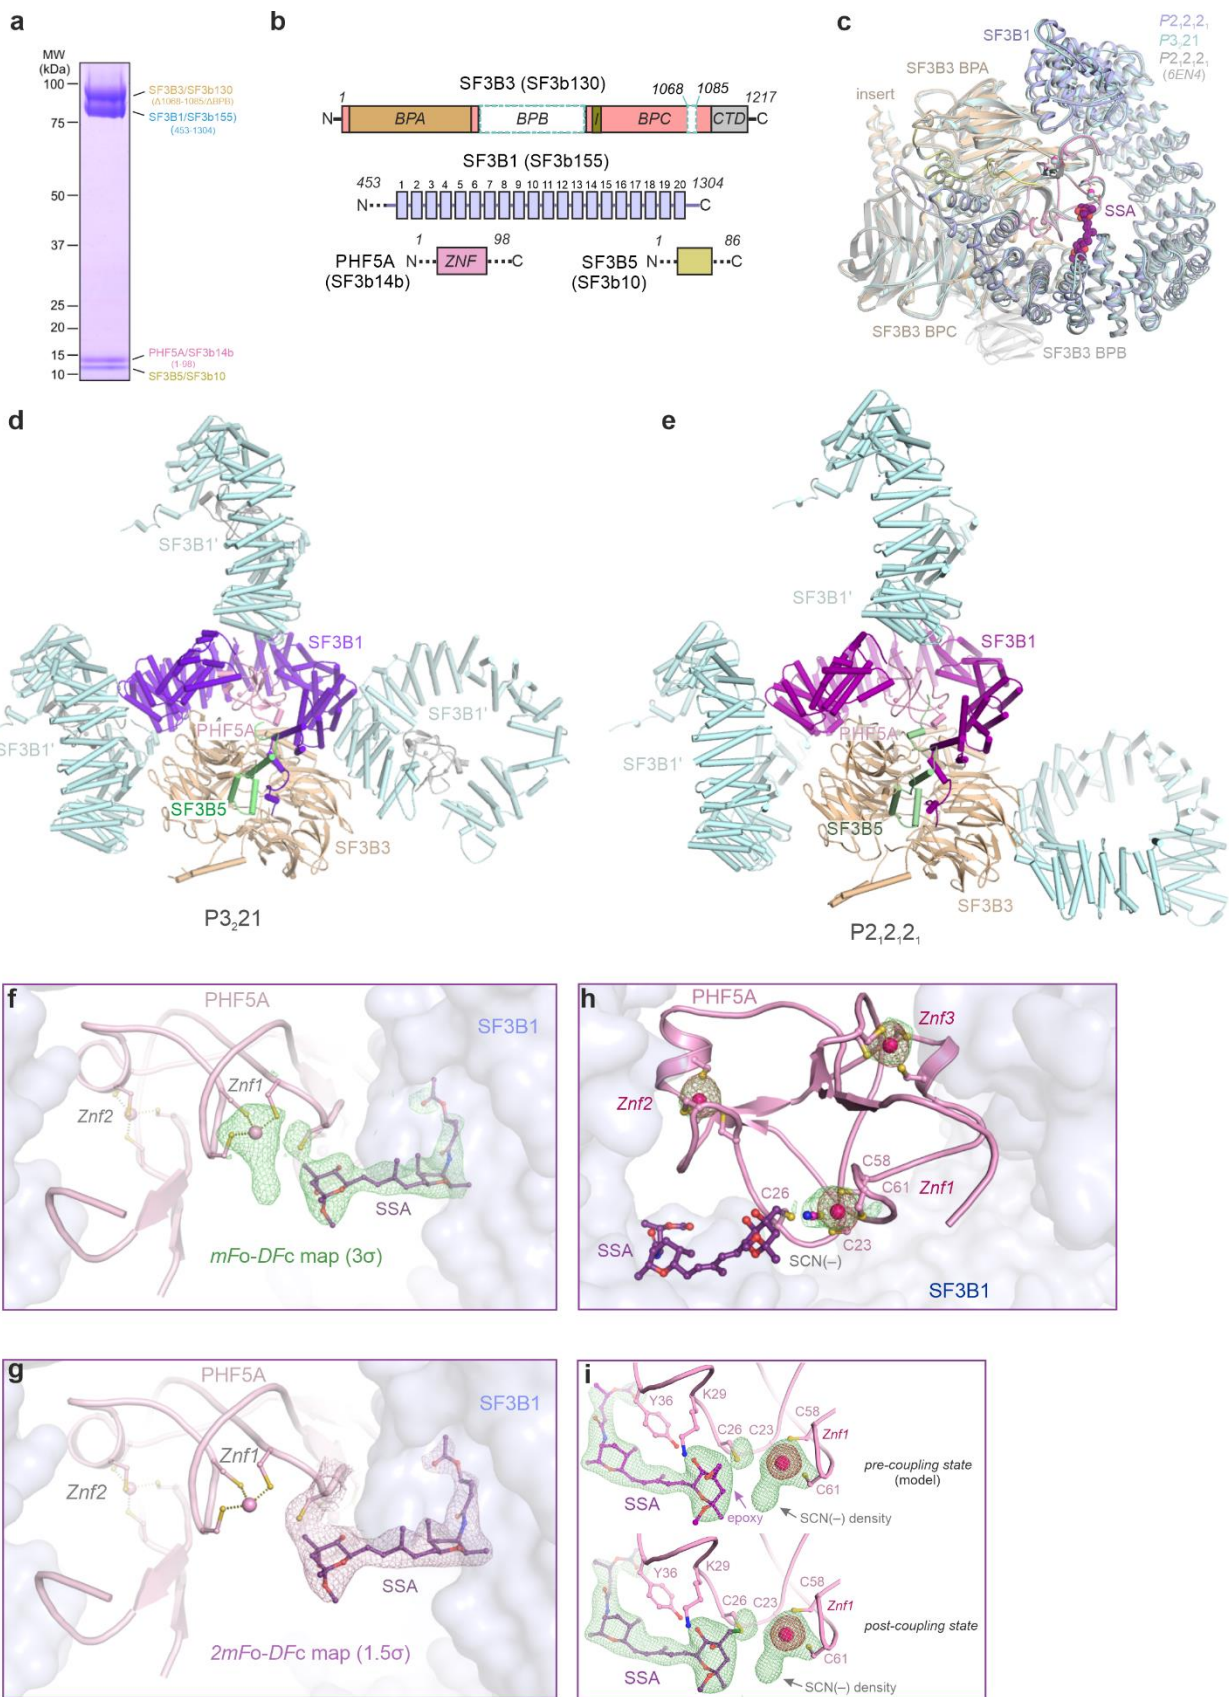

**Supplementary Figure 6. Crystallization and structure determination of a truncated SF3B core lacking the BPB domain of the SF3B3 subunit (SF3B<sup>ΔBPB</sup>) in complex with SSA.** **a** SDS-PAGE analysis of the purified SF3B<sup>ΔBPB</sup> lacking the BPB domain of the SF3B3 subunit. The recombinant SF3B<sup>ΔBPB</sup> complex was purified to homogeneity from insect cells at least three times. Source data are provided as a Source Data File. **b** Domain composition schematic of the SF3B<sup>ΔBPB</sup> complex. **c** Structural superposition of SF3B core complexes co-crystallized with small-molecule splicing modulators in different crystal forms. **d-e** Crystal packing of the SF3B<sup>ΔBPB</sup> complex in two different lattices. Importantly, SF3B1 exhibits the same "open" conformation in the trigonal and orthorhombic crystal forms. **f** Co-crystal structure of SF3B<sup>ΔBPB</sup> in complex with SSA at 2.3 Å resolution. The residual *mFo-DFc* map is contoured around the ligand at 3  $\sigma$  level. The continuous density between C26-PHF5A and SSA is consistent with the formation of a covalent bond. **g** Co-crystal structure of SF3B<sup>ΔBPB</sup> in complex with SSA at 2.3 Å resolution oriented and color-coded as in **f**. The *2mFo-DFc* map is contoured around the ligand at 1.5  $\sigma$  level. **h** Anomalous difference maps (dark red mesh, contoured at 6  $\sigma$  level) of the three zinc finger motifs of PHF5A. The strong anomalous peaks are consistent with the presence of all three zinc atoms in the SF3B<sup>ΔBPB</sup>-SSA co-crystals. The residual *mFo-DFc* maps of the zinc ions (green mesh, contoured at 3  $\sigma$  level) are shown for comparison. **i** Reaction of the epoxy group of SSA with C26-PHF5A does not result in the dissociation of Znf1's zinc ion. The residual *mFo-DFc* map of Znf1 (green mesh, 3  $\sigma$  level) shows that the modified C26 residue is no longer in coordination distance from the zinc ion. The freed zinc coordination shell is, likely, occupied by a thiocyanate ion (SCN<sup>(-)</sup>) present in the crystallization solution. The anomalous difference map is coloured as in **h**.



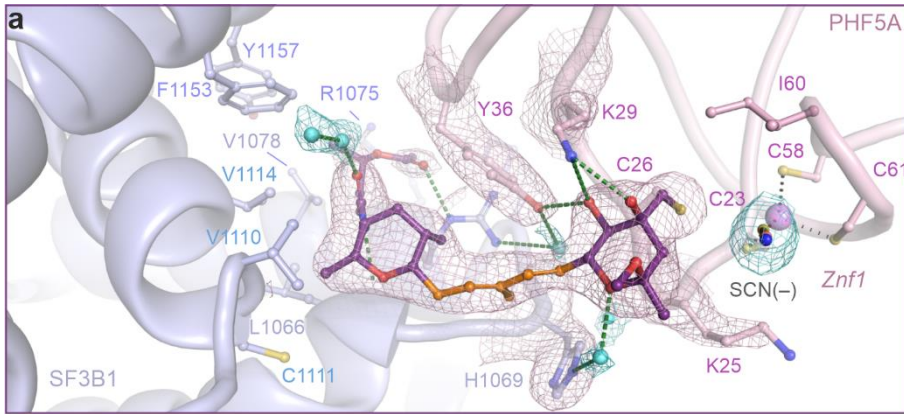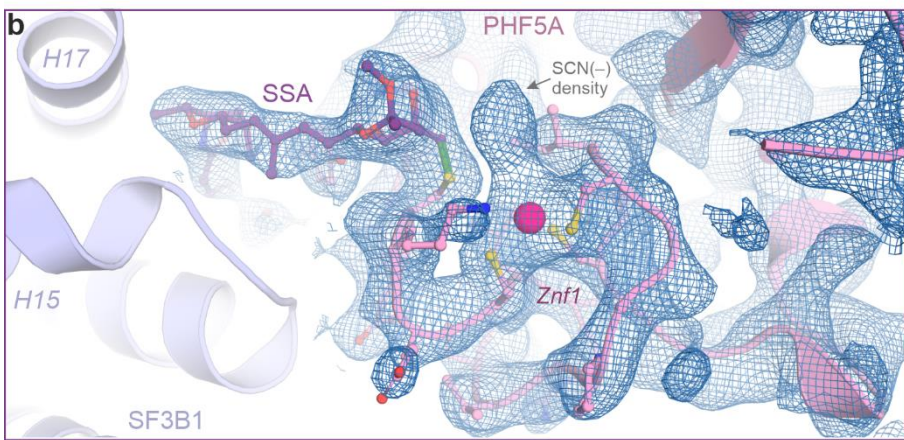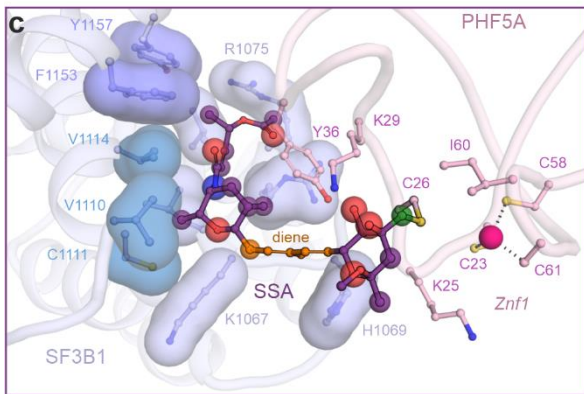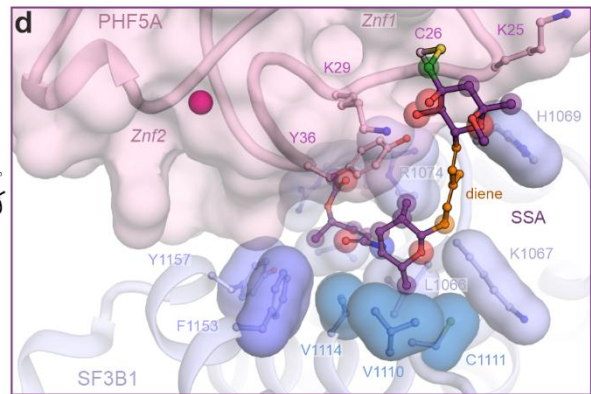

**Supplementary Figure 7. Crystal structure of a truncated SF3B<sup>ΔBPB</sup> in complex with SSA.**

**a** Molecular recognition of SSA by the composite SF3B1-PHF5A binding tunnel. The electron density map ( $2mFo-DFc$ ,  $1.5 \sigma$ ) of the ligand (purple mesh) is contoured around SSA. SF3B1 and PHF5A residues are shown as sticks, while solvent molecules are shown as spheres and colored in cyan. Polar contacts between SF3B1-PHF5A and the splicing modulator are shown as dashed green lines.

**b** Composite omit map of PHF5A-SSA ( $2mFo-DFc$ , contoured at  $1.0 \sigma$ ) showing the local reconfiguration of the Znf1 zinc cluster in the orthorhombic crystal form of SF3B<sup>ΔBPB</sup>. The covalent bond between the C26 residue of PHF5A and SSA is colored in green.

**c-d** Structural organization of the SSA binding pocket depicted in two different orientations. SF3B1's residues belonging to the HEAT repeats H15-H17 are shown in surface representation and coloured in light blue (H15 repeat), dark blue (H16 repeat), and slate (H17 repeat), respectively. PHF5A's residues lining the SSA binding site are coloured in pink and depicted as sticks. SSA's chemical groups involved in hydrophobic interactions and polar contacts with SF3B1 and PHF5A are shown as transparent spheres of different sizes. The diene moiety of the ligand is coloured in orange.

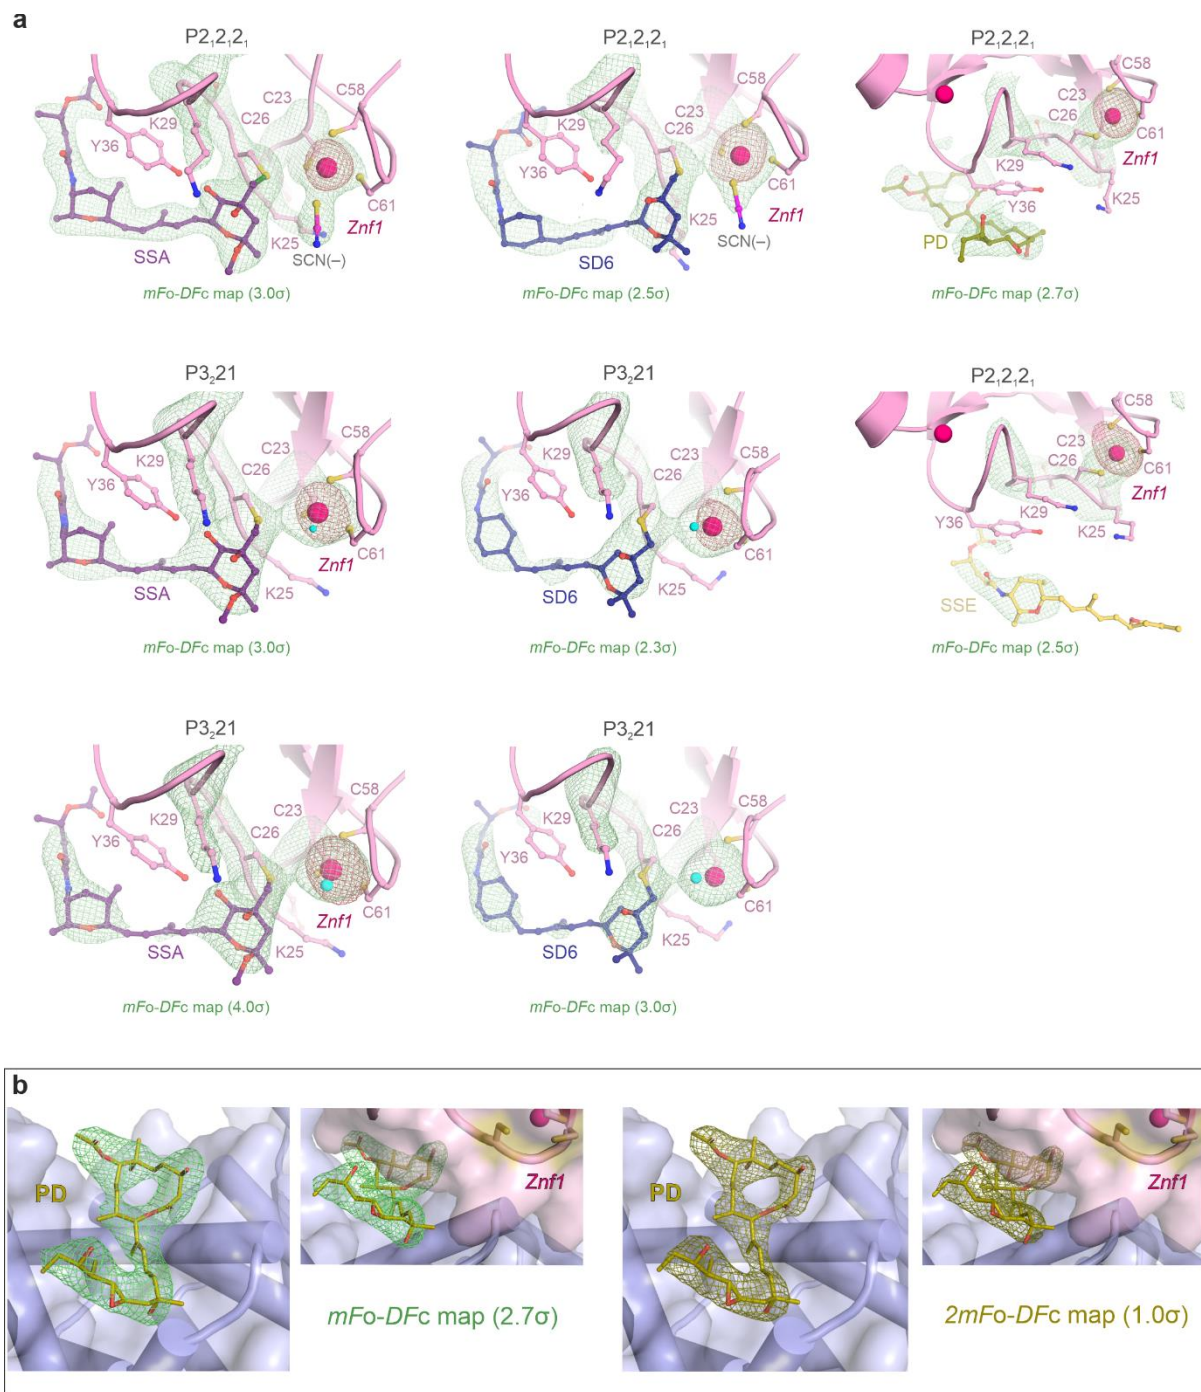

**Supplementary Figure 8. Comparison between different splicing modulators. a** PHF5A's zinc cluster structure in the presence of different splicing modulatory compounds. The residual *mFo-DFc* electron density map (green mesh) is displayed at the indicated contour level around the SF3B ligands and residues 23-29 of PHF5A. An anomalous difference map (dark red mesh) is contoured around Zn1's zinc ion. **b** Crystal structure of SF3B<sup>ΔBPB</sup> in complex with pladienolide D (PD). The residual *mFo-DFc* (green mesh, 2.7  $\sigma$ ) and *2mFo-DFc* (dark olive, 1.0  $\sigma$ ) maps are contoured around the ligand, and the PD binding pocket is depicted in two different orientations. In spite of targeting the same pocket, pladienolide D differs substantially from FR901464 analogues in its overall structure and distance to Zn1.



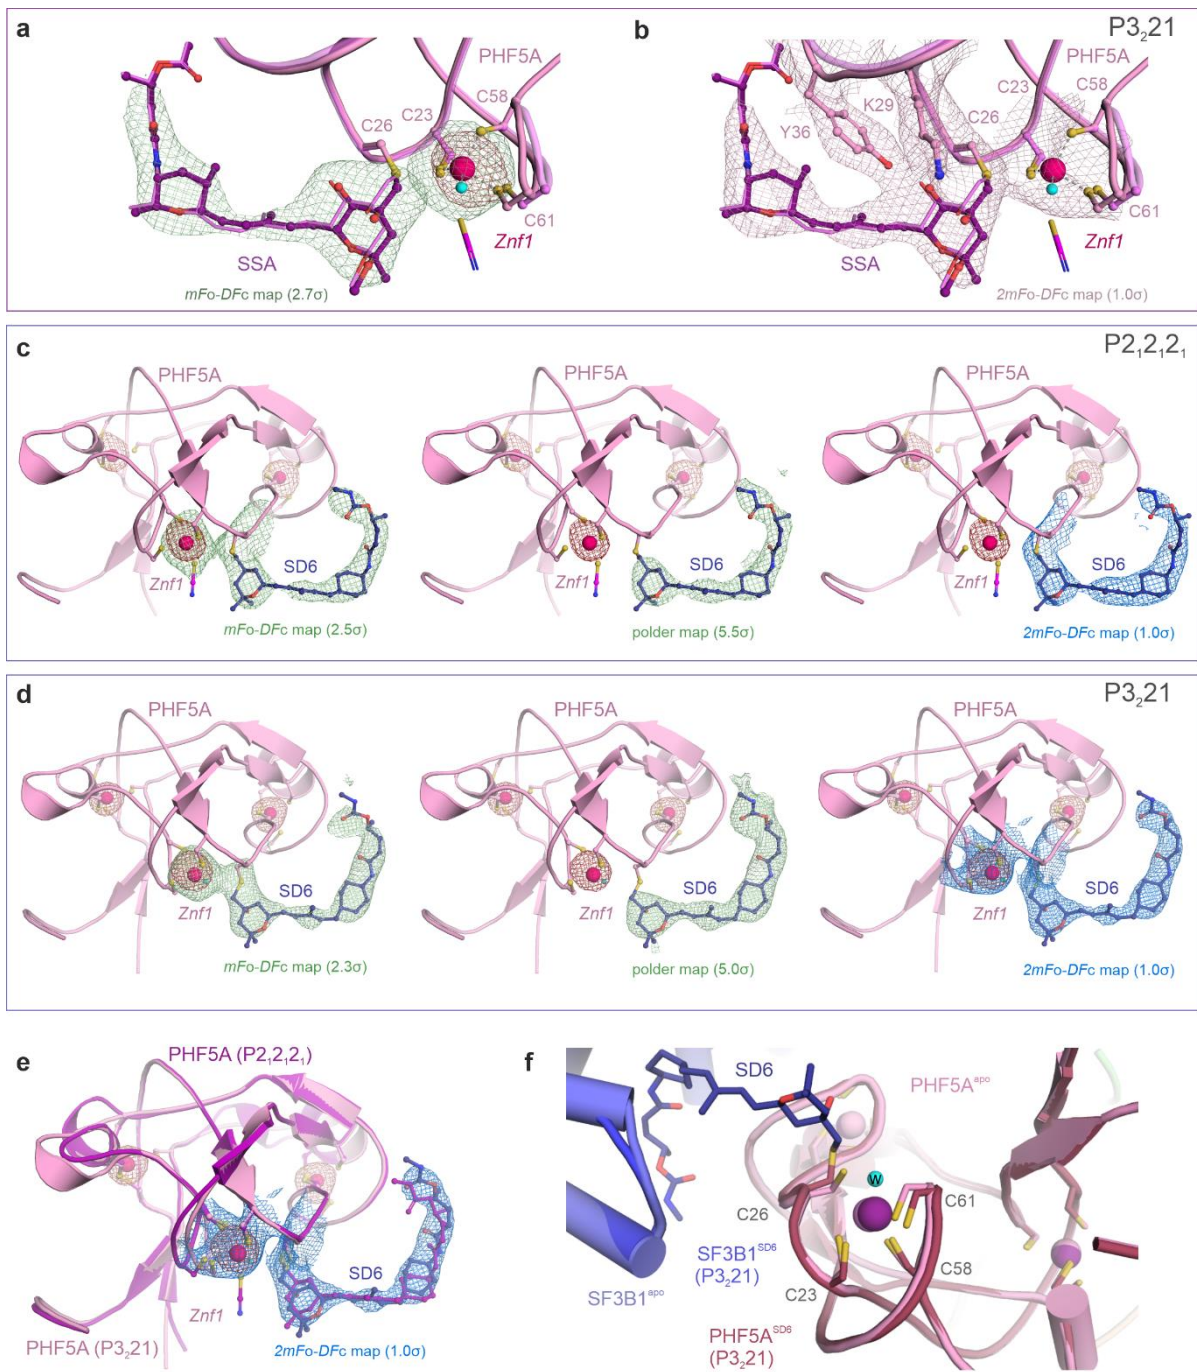



**Supplementary Figure 9. Spliceostatin A (SSA) and sudemycin D6 (SD6) in complex with the SF3B<sup>ΔBPB</sup> crystallize both in the presence or absence of thiocyanate in two distinct space groups. a-b** Electron density maps of SSA crystallized in complex with SF3B<sup>ΔBPB</sup> in an alternative trigonal form (P3<sub>2</sub>21). The residual *mFo-DFc* map (green mesh) is contoured at 2.7  $\sigma$  around SSA, while the *2mFo-DFc* map (purple mesh) and the anomalous difference map (dark red mesh) are contoured at 1.0  $\sigma$  and 5.0  $\sigma$  levels, respectively. PHF5A-SSA from the SF3B<sup>ΔBPB</sup>'s higher resolution model (light magenta) is superimposed onto the complex's alternative crystal form. As in the case of the orthorhombic crystal form, SSA covalently modifies the C26 residue of PHF5A. However, zinc ion's freed coordination shell is, likely, replaced by a solvent molecule (cyan) rather than a thiocyanate ion. **c-d** Electron density maps of sudemycin D6 (SD6) bound to SF3B<sup>ΔBPB</sup> in two alternative crystal forms. The residual *mFo-DFc* (green mesh), polder (green mesh), and *2mFo-DFc* (blue mesh) maps are contoured around SD6. The anomalous difference maps (dark red mesh) for PHF5A's three zinc ions are contoured at 6.0  $\sigma$  level. **e** Superposition of PHF5A-SD6 from SF3B<sup>ΔBPB</sup>'s two alternative crystal forms. The *2mFo-DFc* electron density map (1.0  $\sigma$  level) is contoured around SD6 and the Znf1's zinc ion in the trigonal form crystal structure (P3<sub>2</sub>21). As in the case of the SF3B<sup>ΔBPB</sup>-SSA structures, a local change in the Znf1 zinc cluster structure, compared to the complex's apo state, is observed in the orthorhombic form (P2<sub>1</sub>2<sub>1</sub>2<sub>1</sub>), but not in the trigonal crystals (P3<sub>2</sub>21). **f** Structural alignment between PHF5A-SD6 from the trigonal crystal form (P3<sub>2</sub>21) and the complex's apo state. Compared to the orthorhombic crystal form, it is likely that a solvent molecule (w, cyan) occupies the freed zinc coordination shell.

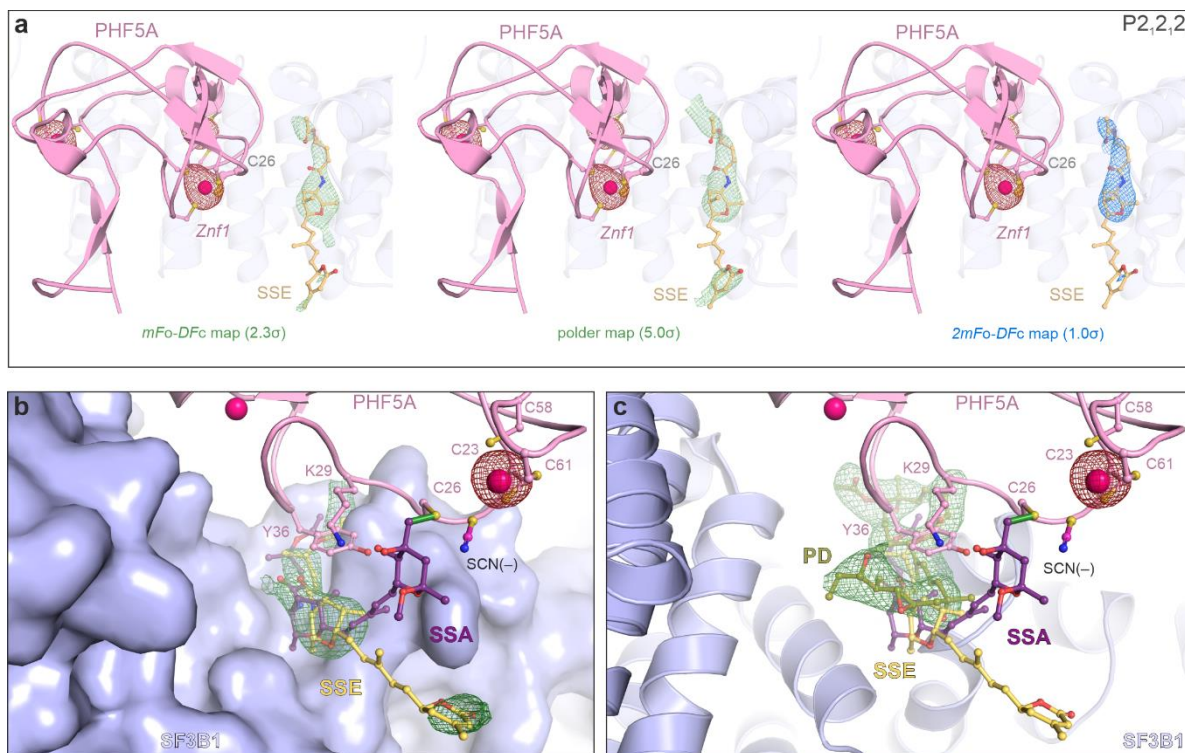

**Supplementary Figure 10. Crystal structure of spliceostatin E (SSE) in complex with SF3B<sup>ΔBPB</sup>.** **a** Crystal structure of SF3B<sup>ΔBPB</sup> in complex with SSE. The residual *mFo-DFc* (green mesh, 2.5  $\sigma$ ), polder (5.0  $\sigma$ ), and *2mFo-DFc* (blue, 1.0  $\sigma$ ) electron density maps are displayed around SSE. An anomalous difference map (dark red, 6.0  $\sigma$ ) is contoured around PHF5A's three zinc ions. Note the presence of ligand density in the SF3B1-PHF5A tunnel corresponding to the distal half of SSE; in contrast, density for the proximal moiety is lacking, likely, because of its relative flexibility in the absence of covalent coupling to C26-PHF5A. **b** Superposition between the SF3B<sup>ΔBPB</sup>-SSA and SF3B<sup>ΔBPB</sup>-SSE crystal structures. The polder electron density map (green mesh, 5.0  $\sigma$ ) is contoured around SSE. **c** Superposition between SSA, SSE, and PD crystal structures in complex with SF3B<sup>ΔBPB</sup>. The residual *mFo-DFc* map (green mesh, 2.7  $\sigma$ ) is displayed around PD.

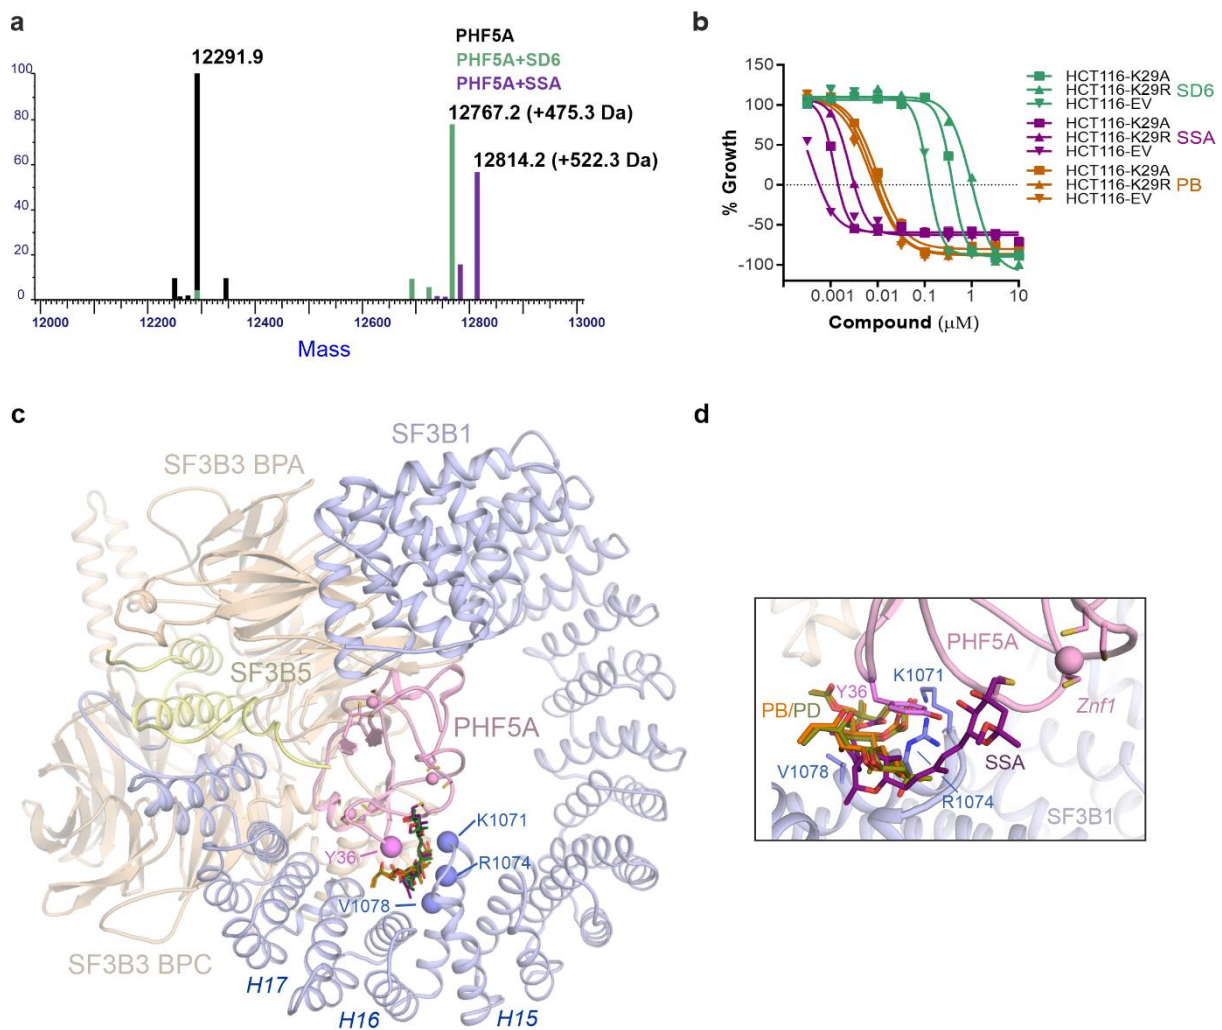

**Supplementary Figure 11. Characterization of the covalent coupling of SSA/SD6 to PHF5A by mass spectrometry and viability assays.** **a** Intact mass spectrometry analysis of the minimal SF3B core complex, alone or in the presence of the splicing modulators SSA or SD6. Note the increment in the mass of PHF5A with the expected mass of coupled compounds which shows that the covalent coupling to PHF5A also occurs in solution. The ~99% conversion to the mono-alkylated adduct is consistent with a 1:1 binding stoichiometry, as observed in the crystal structures of SF3B<sup>ΔBPP</sup> in complex with SSA/SD6. **b** Cell growth inhibition assays of HCT116 cells harboring the K29A and K29R point mutations in PHF5A. EV denotes the empty vector control (see also the Methods section). Error bar indicates SEM, n=2. Source data are provided as Source Data file. **c-d** Superposition of SSA, SD6, PB (PDB 6EN4), and PD modulators in complex with the SF3B core. Structures were aligned using the PHF5A subunit as a reference. SF3B residues whose substitutions confer resistance to splicing modulation are depicted as spheres (**c**) or sticks (**d**)

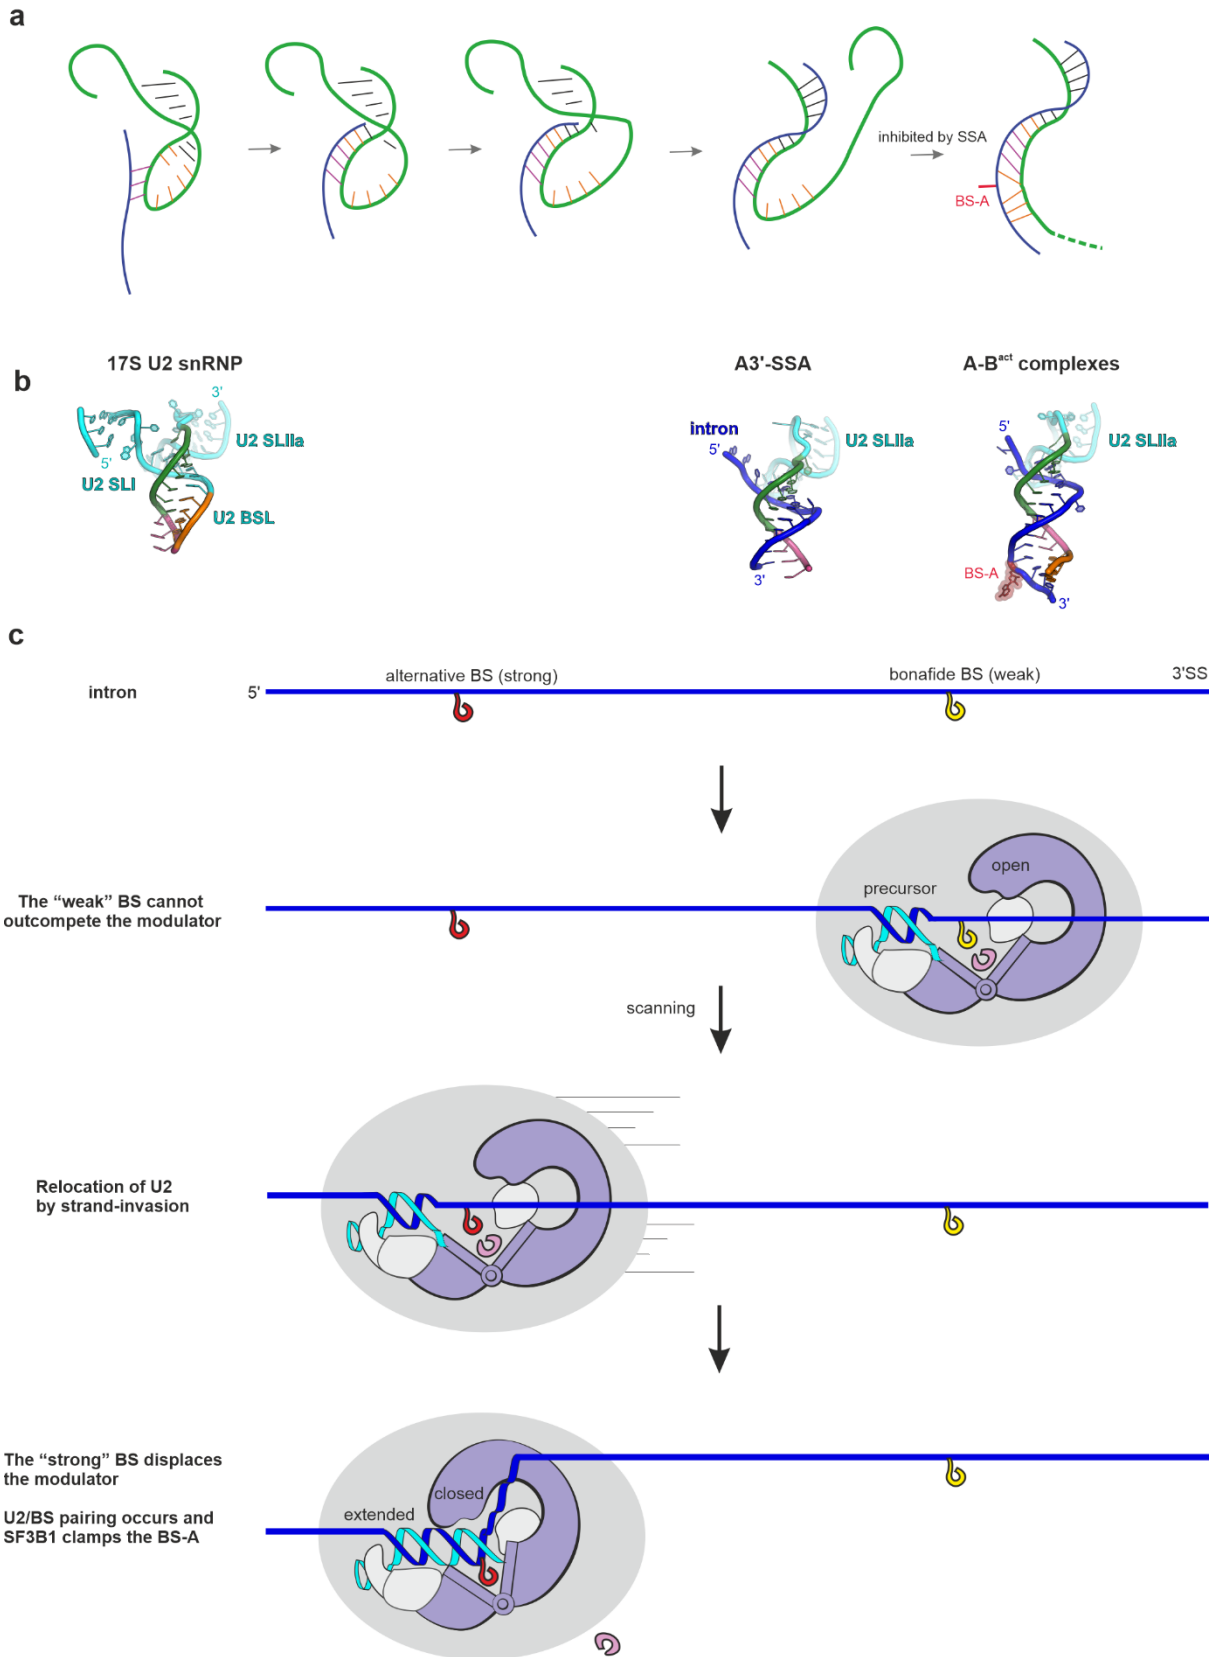



**Supplementary Figure 12. Model of intron selection by a toehold-mediated strand invasion mechanism.** **a** Starting from an internal toehold, the intron invades the U2-BSL, eventually leading to its unwinding and the formation of a precursor U2/intron duplex. The complete pairing of the BS to U2 snRNA results in the formation of the extended U2/intron helix, where the reactive BS-A is bulged out from the duplex. **b** U2 snRNA and U2-intron structures from the cryo-EM models of different spliceosomal complexes. The structures are positioned below the corresponding intermediates in the panel **a** schematic. The available structural data supports the idea that, while allowing BSL's unwinding, SSA interferes with the formation of the extended U2/intron duplex. **c** A strand-invasion model may enable the relocation of the U2 snRNP to alternative, upstream BSs, when the bonafide BS is "weak" and cannot outcompete the modulators. The U2 model is depicted as in Figure 7 and is simplified for clarity's sake.

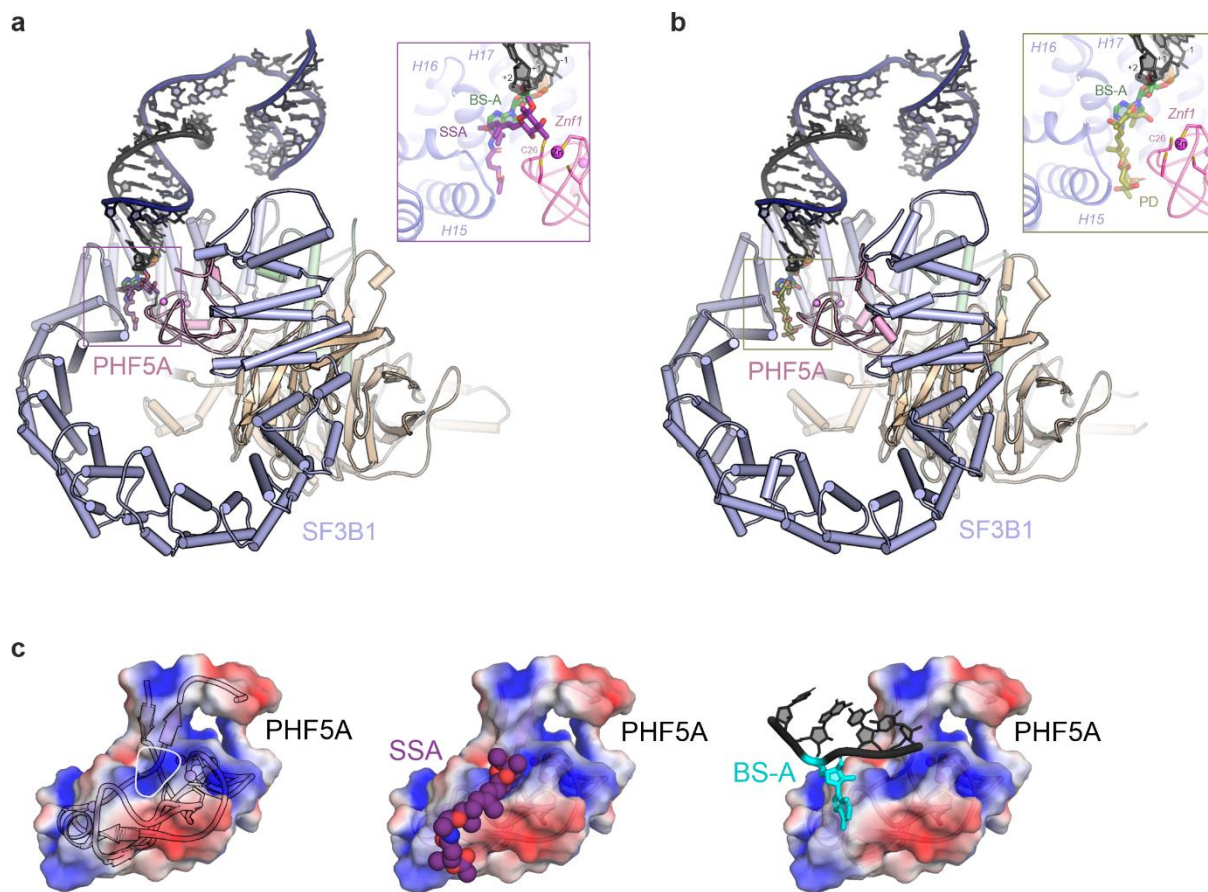

**Supplementary Figure 13. FR901464 analogues, pladienolides, and the branch site adenosine bind the hinged pocket of SF3B1 in a mutually exclusive manner.** a-b Covalent and non-covalent modulators target the same functional state of the SF3B complex, corresponding to its open conformation. Modulators' binding to the SF3B1-Phf5A pocket interferes with the formation of the extended U2/intron duplex and with the accommodation of the bulged BS-A. The U2/intron extended duplex was modeled into the SF3B core crystal structures as previously described (Cretu et al., 2018) and is based on the cryo-EM structure of the human B<sup>act</sup> complex (Haselbach et al., 2018). c Surface charge distribution of Phf5A's RNA-binding interface. The electrostatic potential (+3 kT/e (blue) to -3 kT/e (red)) was mapped onto the solvent excluded surface of Phf5A with APBS and PyMOL ver. 2.4.1. Notably, the epoxy-tetrahydropyran moiety of SSA, which is covalently linked to C26-Phf5A in SF3B<sup>ΔBPB</sup>-SSA structure, occupies a positively charged patch on the surface of Phf5A's RNA binding side. The covalent coupling of the epoxy-tetrahydropyran ring to C26-Phf5A appears to reduce the basic character of Zn1's microenvironment, where the K25-Phf5A and K29-Phf5A residues are located. In fully assembled spliceosomes, K25-Phf5A and K29-Phf5A together with Y36-Phf5A participate in recognition of the BS-A and its proximal regions. This raises the possibility that SSA not only acts by trapping the BS-A binding pocket in an "open" conformation, as pladienolide modulators do, but may also alter the electrostatic complementarity between the BS/U2 helix and SF3B.

## Supplementary Tables

**Supplementary Table 1 Cryo-EM data collection, refinement, and validation statistics**

|                                                               | <b>Overall map</b><br>(map M1) | <b>U2 17S</b><br>(map M4) | <b>U2 5' module</b><br>(EMD-12994)<br>(PDB 7ONB) |
|---------------------------------------------------------------|--------------------------------|---------------------------|--------------------------------------------------|
| <b>Data collection and processing</b>                         |                                |                           |                                                  |
| Electron gun                                                  | XFEG                           |                           |                                                  |
| Detector                                                      | K3                             |                           |                                                  |
| Magnification                                                 | 81000                          |                           |                                                  |
| Energy filter slit width (eV)                                 | 20.0                           |                           |                                                  |
| Voltage (kV)                                                  | 300.0                          |                           |                                                  |
| Flux on detector (e <sup>-</sup> /pix/sec)                    | 22.86                          |                           |                                                  |
| Electron exposure on sample (e <sup>-</sup> /Å <sup>2</sup> ) | 41.41                          |                           |                                                  |
| Target defocus range (μm)                                     | 1.0-2.5                        |                           |                                                  |
| Calibrated pixel size (Å)                                     | 1.05                           |                           |                                                  |
| Symmetry imposed                                              | C1                             |                           |                                                  |
| Collected movies (no.)                                        | 10494                          |                           |                                                  |
| Initial particle images (no.)                                 | 1052001                        |                           |                                                  |
| Final particle images (no.)                                   | 111972                         | 19233                     | 78262                                            |
| Map resolution at FSC=0.143 (Å)                               | 8.40                           | 10.8                      | 3.07                                             |
| Map resolution range (Å)                                      |                                |                           | 2.9-8.2                                          |
| <b>Refinement</b>                                             |                                |                           |                                                  |
| Initial model used (PDB code)                                 |                                |                           | 7B9C, 6FF4, 6FF7                                 |
| Model resolution (Å)                                          |                                |                           | 3.4                                              |
| Model resolution at FSC=0.5 (Å)                               |                                |                           | 3.3                                              |
| Map sharpening B factor (Å <sup>2</sup> )                     |                                |                           | -54                                              |
| Model composition                                             |                                |                           |                                                  |
| Non-hydrogen atoms                                            |                                |                           | 20142                                            |
| Protein residues                                              |                                |                           | 2568                                             |
| RNA nucleotides                                               |                                |                           | 46                                               |
| Ligands                                                       |                                |                           | 1 (SSA)                                          |
| Waters                                                        |                                |                           | -                                                |
| Ions                                                          |                                |                           | 5 (5 x Zn <sup>2+</sup> )                        |
| <i>B</i> factors (Å <sup>2</sup> )                            |                                |                           |                                                  |
| Protein                                                       |                                |                           | 122.23                                           |
| Nucleotide                                                    |                                |                           | 231.68                                           |
| Ligand                                                        |                                |                           | 115.18                                           |
| Water                                                         |                                |                           | -                                                |
| R.m.s. deviations                                             |                                |                           |                                                  |
| Bond lengths (Å)                                              |                                |                           | 0.005                                            |
| Bond angles (°)                                               |                                |                           | 0.899                                            |
| <b>Validation</b>                                             |                                |                           |                                                  |
| Molprobity score                                              |                                |                           | 1.54                                             |
| Clashscore                                                    |                                |                           | 5.59                                             |
| Rotamer outliers (%)                                          |                                |                           | 0.00                                             |
| Cβ outliers (%)                                               |                                |                           | 0.00                                             |
| CaBLAM outliers (%)                                           |                                |                           | 1.68                                             |
| Ramachandran plot                                             |                                |                           |                                                  |
| Favored (%)                                                   |                                |                           | 96.45                                            |
| Allowed (%)                                                   |                                |                           | 3.55                                             |
| Disallowed (%)                                                |                                |                           | 0.00                                             |

**Supplementary Table 2 Data collection, refinement, and validation statistics of the co-crystal structures of SF3B<sup>ABPB</sup> in complex with SSA and PD**

|                                                                        | SF3B <sup>ABPB</sup> -SSA (form I)<br>PDB 7B9C        | SF3B <sup>ABPB</sup> -SSA (form II)<br>PDB 7B0I | SF3B <sup>ABPB</sup> -SSA (form I)<br>Zn K-edge       | SF3B <sup>ABPB</sup> -PD (form I)<br>PDB 7B9I         |
|------------------------------------------------------------------------|-------------------------------------------------------|-------------------------------------------------|-------------------------------------------------------|-------------------------------------------------------|
| <b>Data collection</b>                                                 |                                                       |                                                 |                                                       |                                                       |
| Space group                                                            | <i>P</i> 2 <sub>1</sub> 2 <sub>1</sub> 2 <sub>1</sub> | <i>P</i> 3 <sub>2</sub> 2 <sub>1</sub>          | <i>P</i> 2 <sub>1</sub> 2 <sub>1</sub> 2 <sub>1</sub> | <i>P</i> 2 <sub>1</sub> 2 <sub>1</sub> 2 <sub>1</sub> |
| Wavelength (Å)                                                         | 1.0                                                   | 1.0                                             | 1.281                                                 | 1.023                                                 |
| Cell dimensions                                                        |                                                       |                                                 |                                                       |                                                       |
| <i>a</i> , <i>b</i> , <i>c</i> (Å)                                     | 108.57, 111.07, 248.76                                | 108.50, 108.50, 358.94                          | 107.39, 110.26, 248.64                                | 106.07, 109.80, 251.94                                |
| <i>α</i> , <i>β</i> , <i>γ</i> (°)                                     | 90.0, 90.0, 90.0                                      | 90.0, 90.0, 120.0                               | 90.0, 90.0, 90.0                                      | 90.0, 90.0, 90.0                                      |
| Resolution (Å)                                                         | 49.75-2.3 (2.34-2.3)*                                 | 49.41-2.95 (3.05-2.95)*                         | 49.73-2.6 (2.65-2.6)*                                 | 50.33-2.81 (2.87-2.81)*                               |
| <i>R</i> <sub>meas</sub> (%)                                           | 9.7 (>100)                                            | 11.9 (>100)                                     | 13.3 (>100)                                           | 9.5 (>100)                                            |
| <i>I</i> / <i>σI</i>                                                   | 18.5 (0.7)                                            | 17.6 (0.6)                                      | 15.8 (1.1)                                            | 16.5 (1.0)                                            |
| <i>CC</i> <sub>1/2</sub> (%)                                           | 100.0 (32.9)                                          | 100 (40.2)                                      | 99.9 (54.3)                                           | 99.9 (47.4)                                           |
| Completeness (%)                                                       | 100 (99.5)                                            | 99.9 (99.7)                                     | 99.6 (98.7)                                           | 100.0 (99.6)                                          |
| Redundancy                                                             | 13.6 (13.3)                                           | 19.8 (19.6)                                     | 13.5 (13.0)                                           | 12.9 (12.6)                                           |
| <b>Refinement</b>                                                      |                                                       |                                                 |                                                       |                                                       |
| Resolution (Å)                                                         | 49.44 - 2.4 (2.49-2.4)                                | 43.73-3.0 (3.11-3.0)                            |                                                       | 50.33-3.0 (3.11-3.0)                                  |
| No. reflections                                                        | 118066 (11647)                                        | 50086 (4845)                                    |                                                       | 59727 (5890)                                          |
| <i>R</i> <sub>work</sub> / <i>R</i> <sub>free</sub>                    | 0.216/0.248 (0.350/0.375)                             | 0.213/0.243 (0.385/0.413)                       |                                                       | 0.210/0.255 (0.341/0.378)                             |
| No. Atoms                                                              |                                                       |                                                 |                                                       |                                                       |
| Protein                                                                | 14887                                                 | 14771                                           |                                                       | 14733                                                 |
| Ligand/ion                                                             | 43                                                    | 40                                              |                                                       | 42                                                    |
| Water                                                                  | 137                                                   | 1                                               |                                                       | 1                                                     |
| <i>B</i> -factors (Å <sup>2</sup> )                                    |                                                       |                                                 |                                                       |                                                       |
| Protein                                                                | 74.70                                                 | 119.22                                          |                                                       | 96.34                                                 |
| Ligand/ion                                                             | 59.77                                                 | 97.7                                            |                                                       | 80.76                                                 |
| Water                                                                  | 62.19                                                 | 86.21                                           |                                                       | 76.69                                                 |
| R.m.s. deviations                                                      |                                                       |                                                 |                                                       |                                                       |
| Bond lengths (Å)                                                       | 0.003                                                 | 0.002                                           |                                                       | 0.003                                                 |
| Bond angles (°)                                                        | 0.57                                                  | 0.51                                            |                                                       | 0.57                                                  |
| Ramachandran plot (%)                                                  | 96.36/3.59/0.05                                       | 95.19/4.64/0.16                                 |                                                       | 95.78/4.22/0                                          |
| *Statistics for the highest-resolution shell are shown in parentheses. |                                                       |                                                 |                                                       |                                                       |



**Supplementary Table 3 Data collection, refinement, and validation statistics of the co-crystal structures of SF3B<sup>ABPB</sup> in complex with SD6 and SSE**

|                                                                        | SF3B <sup>ABPB</sup> -SD6 (form II)<br>PDB 7B92 | SF3B <sup>ABPB</sup> -SD6 (form II)<br>Zn K-edge | SF3B <sup>ABPB</sup> -SSE (form I)<br>PDB 7OPI        | SF3B <sup>ABPB</sup> -SD6 (form I)<br>PDB 7OMF        |
|------------------------------------------------------------------------|-------------------------------------------------|--------------------------------------------------|-------------------------------------------------------|-------------------------------------------------------|
| <b>Data collection</b>                                                 |                                                 |                                                  |                                                       |                                                       |
| Space group                                                            | <i>P</i> 3 <sub>2</sub> 21                      | <i>P</i> 3 <sub>2</sub> 21                       | <i>P</i> 2 <sub>1</sub> 2 <sub>1</sub> 2 <sub>1</sub> | <i>P</i> 2 <sub>1</sub> 2 <sub>1</sub> 2 <sub>1</sub> |
| Wavelength (Å)                                                         | 1.0                                             | 1.282                                            | 1.0                                                   | 1.0                                                   |
| Cell dimensions                                                        |                                                 |                                                  |                                                       |                                                       |
| <i>a</i> , <i>b</i> , <i>c</i> (Å)                                     | 108.5, 108.5, 358.94                            | 107.3, 107.3, 361.36                             | 104.54, 108.28, 253.20                                | 106.36, 109.85, 253.30                                |
| $\alpha$ , $\beta$ , $\gamma$ (°)                                      | 90.0, 90.0, 120.0                               | 90.0, 90.0, 120.0                                | 90.0, 90.0, 90.0                                      | 90.0, 90.0, 90.0                                      |
| Resolution (Å)                                                         | 49.41-2.95 (3.05-2.95)*                         | 49.01-3.42 (3.59-3.42)*                          | 49.78-2.9 (2.97-2.90)*                                | 49.03-2.9 (2.97-2.9)*                                 |
| <i>R</i> <sub>meas</sub> (%)                                           | 11.9 (>100)                                     | 25.2 (>100)                                      | 8.8 (>100)                                            | 9.0 (>100)                                            |
| <i>I</i> / $\sigma$ <i>I</i>                                           | 17.6 (0.6)                                      | 13.0 (1.4)                                       | 17.5 (0.8)                                            | 19.1 (0.7)                                            |
| <i>CC</i> <sub>1/2</sub> (%)                                           | 100 (40.2)                                      | 99.9 (52.8)                                      | 100 (43.1)                                            | 100 (38.9)                                            |
| Completeness (%)                                                       | 99.9 (99.7)                                     | 99.9 (99.6)                                      | 99.9 (98.3)                                           | 99.9 (98.9)                                           |
| Redundancy                                                             | 19.8 (19.6)                                     | 20.7 (21.3)                                      | 13.5 (13.8)                                           | 13.7 (13.8)                                           |
| <b>Refinement</b>                                                      |                                                 |                                                  |                                                       |                                                       |
| Resolution (Å)                                                         | 46.52-3.0 (3.11-3.0)                            |                                                  | 48.43-3.1 (3.21-3.1)                                  | 48.8-3.0 (3.11-3.0)                                   |
| No. reflections                                                        | 49021 (4677)                                    |                                                  | 52968 (5196)                                          | 60220 (5926)                                          |
| <i>R</i> <sub>work</sub> / <i>R</i> <sub>free</sub>                    | 0.223/0.258 (0.397/0.414)                       |                                                  | 0.235/0.277 (0.449/0.445)                             | 0.232/0.266 (0.423/0.447)                             |
| No. Atoms                                                              |                                                 |                                                  |                                                       |                                                       |
| Protein                                                                | 14754                                           |                                                  | 14765                                                 | 14812                                                 |
| Ligand/ion                                                             | 37                                              |                                                  | 36                                                    | 40                                                    |
| Water                                                                  | 1                                               |                                                  | -                                                     | -                                                     |
| <i>B</i> -factors (Å <sup>2</sup> )                                    |                                                 |                                                  |                                                       |                                                       |
| Protein                                                                | 102.23                                          |                                                  | 117.56                                                | 112.64                                                |
| Ligand/ion                                                             | 105.0                                           |                                                  | 113.55                                                | 108.18                                                |
| Water                                                                  | 97.25                                           |                                                  | -                                                     | -                                                     |
| R.m.s. deviations                                                      |                                                 |                                                  |                                                       |                                                       |
| Bond lengths (Å)                                                       | 0.003                                           |                                                  | 0.002                                                 | 0.003                                                 |
| Bond angles (°)                                                        | 0.55                                            |                                                  | 0.56                                                  | 0.61                                                  |
| Ramachandran plot (%)                                                  | 94.76/5.03/0.22                                 |                                                  | 94.76/4.81/0.43                                       | 95.97/3.93/0.11                                       |
| *Statistics for the highest-resolution shell are shown in parentheses. |                                                 |                                                  |                                                       |                                                       |

**Supplementary Table 4 Primer and DNA sequences used in this study**

| Gene name                             | Forward (5'-3')                                                                                                                                                                                                                                                                                                                                              | Reverse (5'-3')                          |
|---------------------------------------|--------------------------------------------------------------------------------------------------------------------------------------------------------------------------------------------------------------------------------------------------------------------------------------------------------------------------------------------------------------|------------------------------------------|
| <i>SF3B1</i>                          | CCGAGGAGTCGACCATGAAGTCTGTCAACG                                                                                                                                                                                                                                                                                                                               | AGGCTCTAGATTACAGGATGTAGTCCAGTTCGTAGC     |
| <i>PHF5A</i>                          | GATCTCGAGCCATGGCCAAGCACCACCCTGA                                                                                                                                                                                                                                                                                                                              | GCGCTAGCATTACAGGTCGGTCTTAGAAG            |
| <i>SF3B3</i><br>( <i>Δ1068-1085</i> ) | TCTCAAAGGCCGAAGTCATCATGAACTA                                                                                                                                                                                                                                                                                                                                 | GTCCACTTCGTCGTTGGTGTAGGAGGCA             |
| <i>SF3B3</i><br>( <i>ΔBPB</i> )       | CAGTCCGTGCCTCAGGACCCTCAGAGAG                                                                                                                                                                                                                                                                                                                                 | GGAGGAAACGGAAACTCTGGAGAAAAGCTGGGAGCCGTGT |
| A3' gBLOCK                            | TACTTCCAATCCAATGCAACGCTAGAGGATCCTTGTCGACTAGGTAATACGACTCACTATAGGGCGCAGTAGTCC<br>AGGGTTTCCTTGATGATGTCATACTTATCCTGTCCCTTTTTTTTCCACAGCTCGCGGTTGAGGACAAACTCTTCGC<br>GGTCTTTCCACAGGTAAGTTGGAAGCATGTAGAACCTTGGATCCGATATCCGTACACCATCAGGGTACGAGCTAG<br>CCCATGGCGTACACCATCAGGGTACGACTAGTAGATCTCGTACACCATCAGGGTACGGAATTCTCTAGAGTCGAG<br>TTCTATAGTAATAACATTGGGAAGTGGATAA |                                          |
